# Supplementary material for: Associations of Maternal Weight Gain in Pregnancy With Offspring Cognition in Childhood and Adolescence: Findings From the Avon Longitudinal Study of Parents and Children
Source: PubMed Central journal article supplement — Am J Epidemiol. 2013 Feb 6;177(5):402–10. doi: 10.1093/aje/kws239 (PMC3581073; doi:10.1093/aje/kws239), 2013-02-06

## **SUPPLEMENTAL MATERIAL**

### **Web Appendix**

#### **Details of random effects statistical modelling to determine gestational weight gain parameters**

The sample was limited to mothers of offspring born at term (at least 37 weeks gestation) and alive. We divided the gestational period into 2-week stages, from 4 weeks onwards. Where an individual woman had more than one measurement in one of these two-week periods, one was chosen randomly for inclusion in the sample.

Thus, each woman could contribute a maximum of 20 weight measures to the model.

Deletion of obvious errors in weights and dates, and elimination of repeat measures within the two week period, gave a sample for model development of 12,484 women with a total of 114,988 weight measures.

There was little evidence that patterns of gestational weight gain (GWG) differed markedly between mothers of female and male offspring; predicted mean pre-pregnancy weight was 0.479 ( 0.05, 0.91) kg greater for mothers of male compared to female offspring ( $p = 0.025$ ) but otherwise there were no differences. One model was constructed for mothers of both female and male offspring, and interactions between sex of offspring and gestational weight gain included. Multilevel models (with two levels: antenatal visit, within mother) were used to relate weight at each visit to gestational age of the child at that visit. Fractional polynomials were used to derive the best-fitting function to describe the pattern of weight gain with gestational age. However, although fractional polynomials provide a flexible way to examine such relationships, they do not provide parameters that are clinically relevant or easily interpreted. For example, here the best-fitting polynomial had powers of 2 and 3, indicating that weight was related to gestational age squared and gestational age cubed. We therefore used the best-fitting fractional polynomial to derive a piecewise linear spline model.

Here, the best approximation to the fractional polynomial was provided by a spline model with three linear portions: from 0 to 18 weeks gestation; from 19 to 28 weeks gestation; and, from 29 weeks gestation to birth.

The positioning of the knots was chosen by varying the positions of the knots (in whole gestational weeks) around the approximate times and selecting the model with the smallest residuals throughout the range of gestational age. This linear spline multilevel model enabled estimation of the individual pre-pregnancy weight and weight gain during each period, for each woman. In addition, the model allowed variation in measurement between occasions and within subjects, thereby capturing the change in the variance of measurements with age. The model was estimated using maximum likelihood estimation within MLWiN.1. The final multilevel spline model is shown below.

Multilevel spline model:

$weight_{ij} = \beta_{0i} + \beta_{1i}age_{0to18ij} + \beta_{2i}age_{18to28ij} + \beta_{3i}age_{29plusij} + e_{ij}$  where, for mother  $i$  ( $i=1$  to 12,484) at measurement occasion  $j$  ( $j=1$  to 18):

$\beta_{0i}$ =individual estimate of weight at gestational age=0 for the  $i$ th mother

$\beta_{1i}$ = individual estimate of rate of weight gain during the first 18 weeks for the  $i$ th mother

$\beta_{2i}$ =individual estimate of rate of weight gain during weeks 18-28 for the  $i$ th mother

$\beta_{3i}$ =individual estimate of rate of weight gain after week 28 for the  $i$ th mother

$age_{0to18ij}$ = the value of the first linear spline at the gestational age of the  $j$ th observation for the  $i$ th mother

$age_{18to28ij}$ = the value of the second linear spline at the gestational age of the  $j$ th observation for the  $i$ th mother

$age_{29tomaxij}$ = the value of the third linear spline at the gestational age of the  $j$ th observation for the  $i$ th mother

$e_{ij}$  = measurement error

Table 1 shows the fit of this model when compared to the measured weights at each time point. It shows high level of agreement between predicted and actual weight, demonstrating the goodness of fit of the model.

With analyses restricted to births occurring between 37-44 weeks there were between 1 and 18 measures of weight per woman, with average 11.2 (median 10, sd 3.7, IQR 8, 11). In the first period (0-18 weeks) there were between 0 and 7 measures per woman, with an average of 2.0 (median 2, sd 1.01, IQR 1, 3). In the second period (18-28 weeks) there were between 0 and 5 measures per woman, with an average of 2.2 (median 2, sd 1.0, IQR 2, 3). In the third period (29+ weeks) there were between 0 and 8 measures per woman, with an average of 4.9 (median 5, sd 1.6, IQR 4,6). All mother-offspring pairs are included in the analyses provided the mother has at least one measure of gestational weight. This approach to modelling repeat measurements provides estimated coefficients in each gestational age period even if the woman has no measurements in that particular period. This is because the overall model uses all data and will use the woman's values in other periods to give a predicted coefficient for the period where she has no data based on the overall model using data from all women. If women with few weight measurements differed from those with more measurements (in particular those who had measurements in all periods) in such a way that associations with outcomes differed between the two groups then our results would be biased. In order to explore this possibility we conducted sensitivity analyses in which predicted GWG derived from multilevel models were repeated with only those women who had at least 2, 4 and 3 measures in each time period respectively (i.e. total of at least 9 per woman across pregnancy).

Web Figure 1 shows the pattern predicted by the multilevel fractional polynomial model. This shows that the final spline model used in the analyses fits closed to the fractional polynomial fitted to the data in the multilevel model. Web-figure 2 shows the difference between predicted and observed weight plotted against the average of predicted and observed weight. The difference between predicted and actual weight gets very slightly smaller as weight increases – an average difference of 0.004kg for women of weight 70kg, with an average difference of -0.31kg for women of weight 168kg (the maximum weight in our dataset, indicating that for these women predicted weight is on average 0.31kg lower than measured weight) and 0.12kg for women of weight 36kg (the minimum weight in our dataset, indicating that for these women predicted weight is on average 0.12kg higher than measured weight).

**Web Table 1: Fit of the model (predicted weight) to actual weight at each time Period, in Avon Longitudinal Study of Parents And Children, Bristol, UK.**

| Gestational age (weeks) | Number of measurements | Weight (mean (SD)) kg | Predicted weight (mean(SD)) kg | Difference (actual-predicted) (median) kg | 90% limits of agreement (kg) <sup>b</sup> |
|-------------------------|------------------------|-----------------------|--------------------------------|-------------------------------------------|-------------------------------------------|
| <b>&lt;=4</b>           | 23                     | 65.89 (12.95)         | 65.59 (12.94)                  | 0.10                                      | -0.55, 1.25                               |
| <b>5-6</b>              | 178                    | 64.55 (13.54)         | 64.30 (13.53)                  | 0.29                                      | -0.88, 1.53                               |
| <b>7-8</b>              | 1,206                  | 64.53 (12.30)         | 64.25 (12.27)                  | 0.29                                      | -0.73, 1.28                               |
| <b>9-10</b>             | 3,154                  | 64.36 (12.20)         | 64.27 (12.15)                  | 0.11                                      | -0.91, 0.99                               |
| <b>11-12</b>            | 4,810                  | 64.37 (12.16)         | 64.41 (12.09)                  | -0.01                                     | -1.11, 0.91                               |
| <b>13-14</b>            | 5,457                  | 64.69 (11.84)         | 64.84 (11.78)                  | -0.12                                     | -1.30, 0.94                               |
| <b>15-16</b>            | 4,646                  | 65.39 (12.15)         | 65.53 (12.11)                  | -0.15                                     | -1.32, 1.06                               |
| <b>17-18</b>            | 6,587                  | 66.02 (11.87)         | 66.02 (11.82)                  | -0.01                                     | -1.11, 1.14                               |
| <b>19-20</b>            | 4,722                  | 67.26 (12.18)         | 67.19 (12.14)                  | 0.06                                      | -0.99, 1.19                               |
| <b>21-22</b>            | 5,790                  | 68.03 (11.94)         | 67.98 (11.90)                  | 0.06                                      | -1.20, 1.26                               |
| <b>23-24</b>            | 5,061                  | 69.35 (12.24)         | 69.28 (12.18)                  | 0.09                                      | -1.30, 1.37                               |
| <b>25-26</b>            | 5,770                  | 70.07 (11.96)         | 69.96 (11.91)                  | 0.11                                      | -1.18, 1.42                               |
| <b>27-28</b>            | 6,035                  | 71.46 (11.98)         | 71.46 (11.91)                  | -0.002                                    | -1.14, 1.15                               |
| <b>29-30</b>            | 8,307                  | 72.26 (12.04)         | 72.30 (11.97)                  | -0.03                                     | -1.14, 1.08                               |
| <b>31-32</b>            | 8,907                  | 73.17 (12.16)         | 73.24 (12.13)                  | -0.08                                     | -1.30, 1.17                               |
| <b>33-34</b>            | 9,769                  | 74.00 (12.05)         | 74.08 (12.03)                  | -0.08                                     | -1.39, 1.23                               |
| <b>35-36</b>            | 10,286                 | 74.99 (12.31)         | 75.00 (12.30)                  | -0.004                                    | -1.26, 1.25                               |
| <b>37-38</b>            | 10,927                 | 75.95 (12.29)         | 75.90 (12.24)                  | 0.05                                      | -1.11, 1.20                               |
| <b>39-40</b>            | 9,215                  | 76.97 (12.35)         | 76.96 (12.30)                  | 0.003                                     | -1.11, 1.17                               |
| <b>41-42</b>            | 3,991                  | 78.28 (12.46)         | 78.33 (12.35)                  | -0.9                                      | -1.20, 1.14                               |
| <b>&gt;42</b>           | 147                    | 80.69 (15.04)         | 80.82 (14.76)                  | -0.20                                     | -1.51, 1.59                               |

Abbreviations: SD: Standard Deviation

a Total number of measurements in each strata of gestational age (i.e. number of women\*number of measurements that woman had)

b These indicate the range within which 90% of the differences lie in this sample

**Web Table 2. Associations of Institute Of Medicine Categories of Maternal Gestational Weight Gain With Offspring Cognition, adjustment for birthweight and SEA (IQ and late school results) in Avon Longitudinal Study of Parents And Children, Bristol, UK.**

| Outcome                         | Model          | Less than recommended GWG |            |                   | As rec. | More than recommended |            |                  |
|---------------------------------|----------------|---------------------------|------------|-------------------|---------|-----------------------|------------|------------------|
|                                 |                | Mean SD difference        | Odds Ratio | 95% CI            | GWG     | GWG                   | Odds Ratio | 95% CI           |
| SEA <sup>c</sup><br>N=,5832     | 1 <sup>a</sup> | -0.054                    |            | -0.107,<br>-0.002 | 0       | -0.006                |            | -0.062,<br>0.050 |
| IQ at 8 <sup>c</sup><br>N=5,191 | 1 <sup>a</sup> | -0.002                    |            | -0.062,<br>0.057  | 0       | 0.047                 |            | -0.018,<br>0.112 |
|                                 | 2 <sup>b</sup> | -0.002                    |            | -0.065,<br>0.062  | 0       | 0.060                 |            | 0.021,<br>0.159  |
| Final-exam results<br>N=7,339   | 1 <sup>a</sup> |                           | 0.90       | 0.79,<br>1.01     | 1       |                       | 0.98       | 0.86,<br>1.12    |
|                                 | 2 <sup>b</sup> |                           | 0.88       | 0.75,<br>1.02     | 1       |                       | 1.00       | 0.86,<br>1.17    |

Abbreviations: BMI: Body Mass Index, CI: Confidence Interval, GWG: Gestational Weight Gain, IOM: Institute of Medicine, IQ: Intelligence Quotient, rec.: Recommended, Ref.: Reference category, SEA: School Entry Assessment, SD: Standard Deviation.

a Model 1 - adjusted for gestational age, maternal age, age at outcome assessment, gender, prepregnancy BMI, parity, maternal smoking, maternal education, mode of delivery and birthweight

b Model 2 - as model 2 plus additional adjustment for standardised School Entry Assessment

c Standardised. SEA SD=3.26, IQ SD=16.47

**Web Table 3. Multivariable Associations of Prepregnancy Weight and Gestational Weight Gain With Offspring Cognition, in Avon Longitudinal Study of Parents And Children, Bristol, UK – adjustment for birthweight and SEA (IQ and late school results)**

| Outcome                                 | Model          | Prepregnancy weight   |            |                | 0-18 weeks               |            |               |            | 18-28 weeks              |            |               |            | 28+ weeks                |            |               |            |
|-----------------------------------------|----------------|-----------------------|------------|----------------|--------------------------|------------|---------------|------------|--------------------------|------------|---------------|------------|--------------------------|------------|---------------|------------|
|                                         |                | Mean SD diff per 1 kg | Odds Ratio | 95% CI         | Mean SD diff per 400g/wk |            | 95% CI        |            | Mean SD diff per 400g/wk |            | 95% CI        |            | Mean SD diff per 400g/wk |            | 95% CI        |            |
| SEA <sup>c</sup>                        | 1 <sup>a</sup> | -0.004                |            | -0.006, -0.003 | 0.048                    |            | -0.006, 0.124 |            | 0.056                    |            | -0.005, 0.116 |            | 0.017                    |            | -0.044, 0.078 |            |
| IQ at 8 <sup>c</sup><br>N=5,191         | 1 <sup>a</sup> | -0.005                |            | -0.008, -0.003 | 0.038                    |            | -0.024, 0.100 |            | 0.036                    |            | -0.033, 0.105 |            | 0.064                    |            | -0.006, 0.133 |            |
|                                         | 2 <sup>b</sup> | -0.002                |            | -0.004, 0.000  | 0.069                    |            | 0.004, 0.135  |            | 0.037                    |            | -0.036, 0.111 |            | 0.069                    |            | -0.007, 0.145 |            |
|                                         |                |                       |            |                | BMI<25                   |            | BMI≥25        |            | BMI<25                   |            | BMI≥25        |            | BMI<25                   |            | BMI≥25        |            |
|                                         |                |                       |            |                | OR                       | 95% CI     | OR            | 95% CI     | OR                       | 95% CI     | OR            | 95% CI     | OR                       | 95% CI     | OR            | 95% CI     |
| Adequate late school results<br>N=7,339 | 1 <sup>a</sup> |                       | 0.98       | 0.98,0.99      | 0.87                     | 0.75, 1.01 | 1.32          | 1.06, 1.65 | 1.01                     | 0.86, 1.18 | 1.12          | 0.87, 1.44 | 1.00                     | 0.85, 1.17 | 1.48          | 1.14, 1.92 |
|                                         | 2 <sup>b</sup> |                       | 0.99       | 0.98,0.99      | 0.82                     | 0.69, 0.99 | 1.34          | 1.04, 1.74 | 1.06                     | 0.97, 1.29 | 1.20          | 0.88, 1.63 | 1.00                     | 0.82, 1.23 | 1.42          | 1.03, 1.96 |

Abbreviations: BMI: Body Mass Index, CI: confidence interval, diff: difference, IQ: Intelligence Quotient, prepreg: prepregnancy, SD: Standard deviation, SEA: School Entry Assessment.

a Model 1 - adjusted for gestational age, maternal age, age at outcome assessment, gender, prepregnancy weight, GWG in previous period, parity, maternal smoking, maternal education, mode of delivery and birthweight

b Model 2 - as model 1 plus additional adjustment for SEA

c Standardised. SEA SD=3.26, IQ SD=16.47



**Web Table 4. Characteristics of participants included and excluded from analyses, in Avon Longitudinal Study of Parents And Children, Bristol UK.**

|                                          | Included in analyses<br><i>n</i> =8650 |    |          | Excluded from analyses |    |          | Total excluded<br><i>n</i> | <i>P</i> -value<br>* |
|------------------------------------------|----------------------------------------|----|----------|------------------------|----|----------|----------------------------|----------------------|
|                                          | Mean (SD)                              | %  | <i>n</i> | Mean (SD)              | %  | <i>n</i> |                            |                      |
| Maternal age at birth (years)            | 28.6 (4.8)                             |    |          | 26.9 (5.1)             |    |          | 2250                       | <0.001               |
| Did not smoke at all during pregnancy    |                                        | 78 | 6758     |                        | 66 | 1307     | 1979                       | <0.001               |
| Maternal education – no higher education |                                        | 86 | 7410     |                        | 91 | 1557     | 1706                       | <0.001               |
| Manual social class                      |                                        | 18 | 1523     |                        | 26 | 280      | 1085                       | <0.001               |
| No previous pregnancies                  |                                        | 47 | 4044     |                        | 40 | 723      | 1827                       | <0.001               |
| Caesarean section                        |                                        | 11 | 909      |                        | 9  | 164      | 1855                       | 0.03                 |
| Pre pregnancy weight (kg)                | 60.8 (12.3)                            |    |          | 60.8 (13.2)            |    |          | 2250                       | 0.83                 |
| Weight gain 0-18 weeks                   | 0.31 (0.18)                            |    |          | 0.30 (0.17)            |    |          | 2250                       | <0.001               |
| Weight gain 18-28 weeks                  | 0.54 (0.17)                            |    |          | 0.53 (0.18)            |    |          | 2250                       | 0.007                |
| Weight gain after 28 weeks               | 0.47 (0.20)                            |    |          | 0.46 (0.20)            |    |          | 2250                       | 0.10                 |
| Males                                    |                                        | 51 | 4403     |                        | 52 | 1161     | 2250                       | 0.56                 |
| Gestational age (weeks)                  | 39.8 (1.3)                             |    |          | 39.8 (1.3)             |    |          | 2250                       | 0.51                 |
| Birth weight (g)                         | 3486.2 (471.3)                         |    |          | 3422.3 (496.9)         |    |          | 1415                       | <0.001               |
| IOM adequate                             |                                        | 38 | 3323     |                        | 34 | 764      | 2250                       | <0.001               |
| SEA                                      | 13.1 (3.1)                             |    |          | 12.0 (3.3)             |    |          | 1551                       | <0.001               |

|                                       |                 |    |      |                 |    |      |      |        |
|---------------------------------------|-----------------|----|------|-----------------|----|------|------|--------|
|                                       |                 |    |      |                 |    |      |      |        |
| IQ age 8,<br>(N=5191)                 | 105.1<br>(16.4) |    |      | 101.4<br>(16.6) |    |      | 816  | <0.001 |
| Achieved 5<br>GCSEs A*-<br>C (N=7339) |                 | 44 | 3212 |                 | 59 | 1116 | 1883 | <0.001 |

Abbreviations: GCSE: General Certificate of Secondary Education, IOM: Institute of Medicine, IQ: Intelligence Quotients, SD: Standard Deviation, SEA: School Entry Assessment

\* chi squared or regression analysis as appropriate

**Web Table 5. Associations of Institute Of Medicine categories of maternal Gestational Weight Gain with high and low GCSE achievement, in Avon Longitudinal Study of Parents And Children, Bristol, UK. n=7,339**

| Outcome       | Model          | Less than recommended |            | As recommended | More than recommended |            |
|---------------|----------------|-----------------------|------------|----------------|-----------------------|------------|
|               |                | Odds Ratio            | 95%CI      | Odds Ratio     | Odds Ratio            | 95%CI      |
| 9 A*/A grades | 1 <sup>a</sup> | 0.97                  | 0.78, 1.22 | 1              | 0.91                  | 0.71, 1.17 |
|               | 2 <sup>b</sup> | 1.02                  | 0.80, 1.29 | 1              | 1.03                  | 0.79, 1.34 |
|               | 3 <sup>c</sup> | 1.11                  | 0.87, 1.41 | 1              | 0.97                  | 0.74, 1.26 |
|               | 4 <sup>d</sup> | 0.98                  | 0.71, 1.34 | 1              | 1.07                  | 0.76, 1.51 |
| 0 A*-C grades |                |                       |            |                |                       |            |
|               | 1 <sup>a</sup> | 1.28                  | 1.10, 1.51 | 1              | 1.20                  | 1.02, 1.42 |
|               | 2 <sup>b</sup> | 1.18                  | 1.00, 1.40 | 1              | 1.23                  | 1.04, 1.47 |
|               | 3 <sup>c</sup> | 1.13                  | 0.95, 1.34 | 1              | 1.29                  | 1.08, 1.54 |
|               | 4 <sup>d</sup> | 1.12                  | 0.91, 1.37 | 1              | 1.17                  | 0.95, 1.44 |

Abbreviations: CI: Confidence Interval, GCSE: General Certificate of Secondary Education.

a Model 1 - adjusted for gestational age, age at exposure measurement and gender

b Model 2 - as model 1 plus additional adjustment for maternal age, parity, maternal smoking, maternal education and mode of delivery

c Model 3 as model 2 plus additional adjustment for birth weight

d Model 4 as model 2 plus additional adjustment for standardised School Entry Assessment Score

**Web Table 6. Associations of Institute Of Medicine categories of maternal Gestational Weight Gain with offspring cognition in mother-offspring pairs with complete data, in Avon Longitudinal Study of Parents And Children, Bristol, UK. *n*=3,340**

| Outcome              | Model          | Less than recommended |            |               | As recommended | More than recommended |            |                |
|----------------------|----------------|-----------------------|------------|---------------|----------------|-----------------------|------------|----------------|
|                      |                | Mean SD difference    | Odds Ratio | 95% CI        | Reference      | Mean SD difference    | Odds Ratio | 95% CI         |
| SEA <sup>e</sup>     | 1 <sup>a</sup> | -0.055                |            | -0.124, 0.013 | 0              | -0.049                |            | -0.121, 0.023  |
|                      | 2 <sup>b</sup> | -0.044                |            | -0.011, 0.022 | 0              | -0.039                |            | -0.109, 0.030  |
|                      | 3 <sup>c</sup> | -0.028                |            | -0.095, 0.039 | 0              | -0.052                |            | -0.122, 0.176  |
|                      | 4 <sup>d</sup> | 0.000                 |            | -0.067, 0.066 | 0              | 0.072                 |            | 0.002, 0.142   |
| IQ at 8 <sup>e</sup> | 1 <sup>a</sup> | -0.028                |            | -0.106, 0.049 | 0              | 0.039                 |            | (0.043, 0.121) |
|                      | 2 <sup>b</sup> | -0.018                |            | -0.091, 0.055 | 0              | 0.052                 |            | -0.025, 0.013  |
|                      | 3 <sup>c</sup> | 0.009                 |            | -0.065, 0.083 | 0              | 0.030                 |            | -0.048, 0.107  |
|                      | 4 <sup>d</sup> | 0.000                 |            | -0.067, 0.066 | 0              | 0.072                 |            | 0.002, 0.142   |
| Final-exam results   | 1 <sup>a</sup> |                       | 0.92       | 0.77, 1.08    | 1              |                       | 0.97       | 0.82, 1.16     |
|                      | 2 <sup>b</sup> |                       | 0.94       | 0.79, 1.13    | 1              |                       | 0.98       | 0.81, 1.17     |
|                      | 3 <sup>c</sup> |                       | 0.97       | 0.81, 1.16    | 1              |                       | 0.95       | 0.79, 1.15     |
|                      | 4 <sup>d</sup> |                       | 0.92       | 0.77, 1.08    | 1              |                       | 0.97       | 0.82, 1.16     |

Abbreviations: CI: Confidence Interval, GCSE: General Certificate of Secondary Education, IQ: Intelligence Quotient, SEA: School Entry Assessment, SD: Standard Deviation.

a Models 1 - adjusted for gestational age, age at exposure measurement and gender

b Model 2 - as model 1 plus additional adjustment for maternal age, parity, maternal smoking, maternal education and mode of delivery

c Model 3 as model 2 plus additional adjustment for birth weight

d Model 4 as model 2 plus additional adjustment for standardised School Entry Assessment Score

e Standardised. SEA SD=3.26, IQ SD=16.47

**Web Table 7. Multivariable associations of prepregnancy weight and GWG with offspring cognition in mother-offspring pairs with complete data, in Avon Longitudinal Study of Parents And Children, Bristol, UK.  $n=3,340$**

| Outcome              | Pregnancy weight         |            |                | 0-18 weeks                     |               | 18-28 weeks                    |               | 29+ weeks                      |                |
|----------------------|--------------------------|------------|----------------|--------------------------------|---------------|--------------------------------|---------------|--------------------------------|----------------|
|                      | Mean difference per 1 kg | Odds Ratio | 95% CI         | Mean difference per 400 g/week | 95% CI        | Mean difference per 400 g/week | 95% CI        | Mean difference per 400 g/week | 95% CI         |
| SEA <sup>f</sup>     | -0.005                   |            | -0.007, -0.003 | 0.074                          | 0.006, 0.143  | 0.118                          | 0.047, 0.188  | 0.210                          | 0.172, 0.248   |
| Model 1 <sup>a</sup> |                          |            |                |                                |               |                                |               |                                |                |
| Model 2 <sup>b</sup> |                          |            |                | 0.036                          | -0.036, 0.108 | 0.105                          | 0.025, 0.185  | 0.230                          | 0.188, 0.272   |
| Model 3 <sup>c</sup> | -0.003                   |            | -0.005, -0.001 | 0.031                          | -0.038, 0.101 | 0.078                          | 0.000, 0.155  | 0.215                          | 0.174, 0.256   |
| Model 4 <sup>d</sup> | -0.004                   |            | -0.006, -0.001 | 0.015                          | -0.055, 0.086 | 0.063                          | -0.016, 0.142 | 0.222                          | 0.181, 0.262   |
| IQ <sup>f</sup>      | -0.007                   |            | -0.009, -0.004 | 0.145                          | 0.069, 0.221  | 0.171                          | 0.094, 0.249  | 0.046                          | 0.003, 0.089   |
| Model 1 <sup>a</sup> |                          |            |                |                                |               |                                |               |                                |                |
| Model 2 <sup>b</sup> |                          |            |                | 0.099                          | 0.019, 0.178  | 0.129                          | 0.041, 0.417  | 0.022                          | -0.026, 0.069  |
| Model 3 <sup>c</sup> | -0.004                   |            | -0.007, -0.001 | 0.091                          | 0.016, 0.166  | 0.096                          | 0.012, 0.180  | 0.002                          | (0.043, 0.047) |

|                       |                      |               |                   |        |               |        |               |               |               |        |                |        |               |        |               |
|-----------------------|----------------------|---------------|-------------------|--------|---------------|--------|---------------|---------------|---------------|--------|----------------|--------|---------------|--------|---------------|
| Model 4 <sup>d</sup>  | -0.005               |               | -0.008,<br>-0.003 | 0.054  | -0.023, 0.130 |        | 0.058         | -0.027, 0.144 |               | 0.122  | -0.033, 0.057  |        |               |        |               |
| Model 5 <sup>e</sup>  | -0.004               |               | -0.006,<br>-0.001 | 0.095  | 0.026, 0.163  |        | 0.082         | 0.005, 0.158  |               | -0.067 | -0.138, -0.055 |        |               |        |               |
| Final-exam<br>results |                      |               |                   | BMI<25 |               | BMI≥25 |               | BMI<25        |               | BMI≥25 |                | BMI<25 |               | BMI≥25 |               |
|                       | Model 1 <sup>a</sup> | 0.99          | 0.98,<br>0.99     | 0.82   | 0.66,<br>1.01 | 1.55   | 1.17,<br>2.06 | 0.98          | 0.80,<br>1.21 | 1.76   | 1.29,<br>2.39  | 1.78   | 0.98,<br>1.41 | 1.61   | 1.23,<br>2.10 |
| Model 2 <sup>b</sup>  |                      |               |                   | 0.82   | 0.66,<br>1.01 | 1.50   | 1.12,<br>2.02 | 1.08          | 0.86,<br>1.36 | 1.53   | 1.07,<br>2.18  | 1.27   | 1.00,<br>1.62 | 1.46   | 1.01,<br>2.11 |
| Model 3 <sup>c</sup>  | 0.99                 | 0.98,<br>1.00 |                   | 0.86   | 0.69,<br>1.08 | 1.43   | 1.05,<br>1.96 | 1.01          | 0.79,<br>1.28 | 1.45   | 0.99,<br>2.12  | 1.06   | 0.83,<br>1.37 | 1.45   | 0.98,<br>2.13 |
| Model 4 <sup>d</sup>  | 0.99                 | 0.98,<br>1.00 |                   | 0.83   | 0.66,<br>1.05 | 1.36   | 0.99,<br>1.87 | 0.97          | 0.76,<br>1.25 | 1.39   | 0.95,<br>2.05  | 1.06   | 0.82,<br>1.36 | 1.43   | 0.97,<br>2.11 |
| Model 5 <sup>e</sup>  | 0.99                 | 0.98,<br>1.00 |                   | 0.87   | 0.69,<br>1.10 | 1.42   | 1.02,<br>1.99 | 1.00          | 0.78,<br>1.30 | 1.44   | 0.96,<br>2.16  | 1.05   | 0.81,<br>1.37 | 1.41   | 0.93,<br>2.13 |

Abbreviations:: Body Mass Index, CI: confidence interval, GCSE: General Certificate of Secondary Education, GWG: Gestational weight gain, IQ: Intelligence Quotient, SEA: School Entry Assessment.

a Model 1 - adjusted for gestational age, age at exposure measure and gender

b Model 2 - as model 1 plus additional adjustment for prepregnancy weight and GWG in previous period

c Model 3 - as model 2 plus additional adjustment for maternal age, parity, maternal smoking, maternal education and mode of delivery

d Model 4 - as model 3 with additional adjustment for birth weight

e Model 5 – as model 3 with additional adjustment for SEA

f Standardised. SEA SD=3.26, IQ SD=16.47

**Web Table 8. Multivariable associations of Institute Of Medicine categories of maternal Gestational Weight Gain with GCSE results from poisson regression models, in Avon Longitudinal Study of Parents And Children, Bristol, UK.**

| Final-exam results<br>N=7,339 | Model          | Less than recommended |            | As recommended | More than recommended |            |
|-------------------------------|----------------|-----------------------|------------|----------------|-----------------------|------------|
|                               |                | Risk Ratio            | 95% CI     |                | Risk Ratio            | 95% CI     |
|                               | 1 <sup>a</sup> | 0.91                  | 0.87, 1.00 | 1              | 0.95                  | 0.89, 1.01 |
|                               | 2 <sup>b</sup> | 0.94                  | 0.89, 1.00 | 1              | 0.96                  | 0.91, 1.01 |
|                               | 3 <sup>c</sup> | 0.96                  | 0.91, 1.01 | 1              | 0.97                  | 0.91, 1.02 |
|                               | 4 <sup>d</sup> | 0.95                  | 0.90, 1.01 | 1              | 0.95                  | 0.90, 1.01 |

Abbreviations: CI: Confidence Interval, GCSE: General Certificate of Secondary Education.

a Models 1 - adjusted for gestational age, maternal age, age at outcome assessment and gender

b Model 2 - as model 1 plus additional adjustment for parity, maternal smoking, maternal education and mode of delivery

c Model 3 - as model 2 plus additional adjustment for birthweight

d Model 4 - as model 2 plus additional adjustment for standardised School Entry Assessment



**Web Table 9. Multivariable associations of prepregnancy weight and GWG with offspring GCSE results from poisson regression models, in Avon Longitudinal Study of Parents And Children, Bristol, UK.**

| 5A*-C<br>GCSE        | Pregnancy weight |            | 0-18 weeks |            |            |            | 18-28 weeks |            |            |            | 28+ weeks  |            |            |            |
|----------------------|------------------|------------|------------|------------|------------|------------|-------------|------------|------------|------------|------------|------------|------------|------------|
|                      |                  |            | BMI <25    |            | BMI ≥25    |            | BMI <25     |            | BMI ≥25    |            | BMI <25    |            | BMI ≥25    |            |
|                      | Risk Ratio       | 95% CI     | Risk Ratio | 95% CI     | Risk Ratio | 95% CI     | Risk Ratio  | 95% CI     | Risk Ratio | 95% CI     | Risk Ratio | 95% CI     | Risk Ratio | 95% CI     |
| Model 1 <sup>a</sup> | 0.99             | 0.99, 0.99 | 0.96       | 0.91, 1.01 | 1.26       | 1.14, 1.39 | 1.01        | 0.95, 1.06 | 1.28       | 1.16, 1.41 | 1.05       | 1.00, 1.10 | 1.27       | 1.16, 1.39 |
| Model 2 <sup>b</sup> |                  |            | 0.95       | 0.90, 1.01 | 1.18       | 1.06, 1.31 | 1.04        | 0.98, 1.10 | 1.15       | 1.01, 1.30 | 1.07       | 1.01, 1.14 | 1.28       | 1.13, 1.45 |
| Model 3 <sup>c</sup> | 0.99             | 0.99, 1.00 | 0.96       | 0.91, 1.02 | 1.17       | 1.06, 1.29 | 1.01        | 0.95, 1.08 | 1.07       | 0.95, 1.21 | 1.00       | 0.94, 1.06 | 1.21       | 1.07, 1.37 |
| Model 4 <sup>d</sup> | 0.99             | 0.99, 0.99 | 0.96       | 0.90, 1.01 | 1.15       | 1.03, 1.27 | 1.01        | 0.95, 1.07 | 1.06       | 0.95, 1.20 | 1.00       | 0.94, 1.06 | 1.21       | 1.07, 1.36 |
| Model 5 <sup>e</sup> | 0.99             | 0.99, 1.00 | 0.94       | 0.89, 1.01 | DNC        | DNC        | 1.02        | 0.95, 1.09 | DNC        | DNC        | 1.00       | 0.93, 1.07 | DNC        | DNC        |

Abbreviations: BMI: Body Mass Index, CI: confidence interval, DNC: did not converge, GCSE: General Certificate of Secondary Education, GWG: Gestational weight gain, IQ: Intelligence Quotient, SEA: School Entry Assessment.

a Model 1 - adjusted for gestational age, age at exposure measure and gender

b Model 2 - as model 1 plus additional adjustment for prepregnancy weight and GWG in previous period

c Model 3 - as model 2 plus additional adjustment for maternal age, parity, maternal smoking, maternal education and mode of delivery

d Model 4 - as model 3 with additional adjustment for birth weight

e Model 5 – as model 3 with additional adjustment for SEA

**Web Figure 1: Graph showing the pattern predicted by the fractional polynomial for the multilevel model and the spline that was fitted to the data**

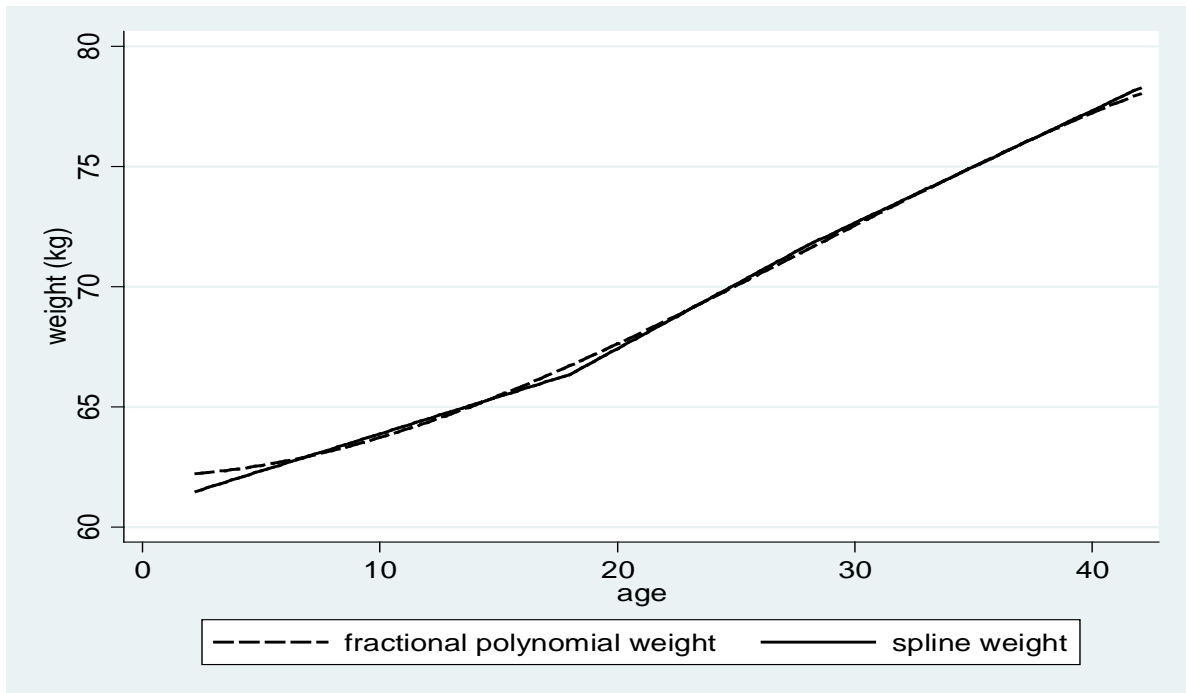

**Web Figure 2: Bland-Altman plot showing the difference between predicted and observed weight plotted against the average of predicted and observed weight, with 95% limits of agreement**

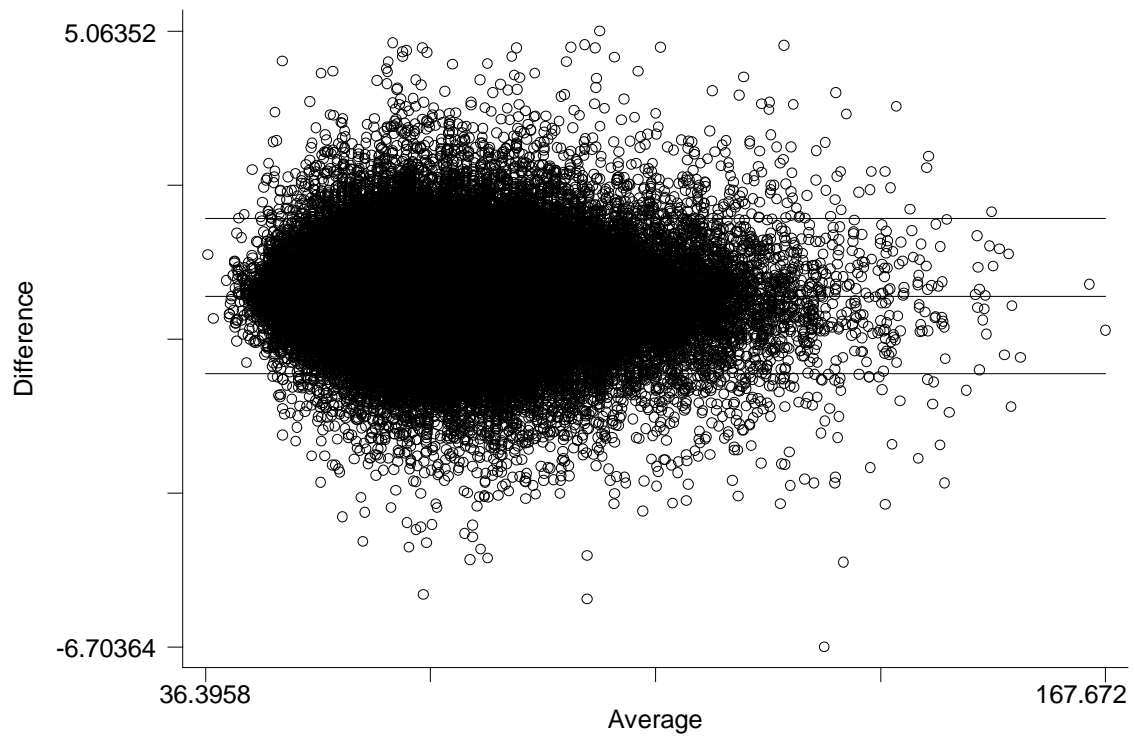

Supplement: supp_kws239_kws239_web_material.pdf [file supp_kws239_kws239_web_material.pdf]
